# Supplementary material
Source: PubMed Central journal article supplement (PMC2823436)
Supplement: supp_M109.056846_jbc.M109.056846-1.pdf [file supp_M109.056846_jbc.M109.056846-1.pdf]

Supplemental Figure 1

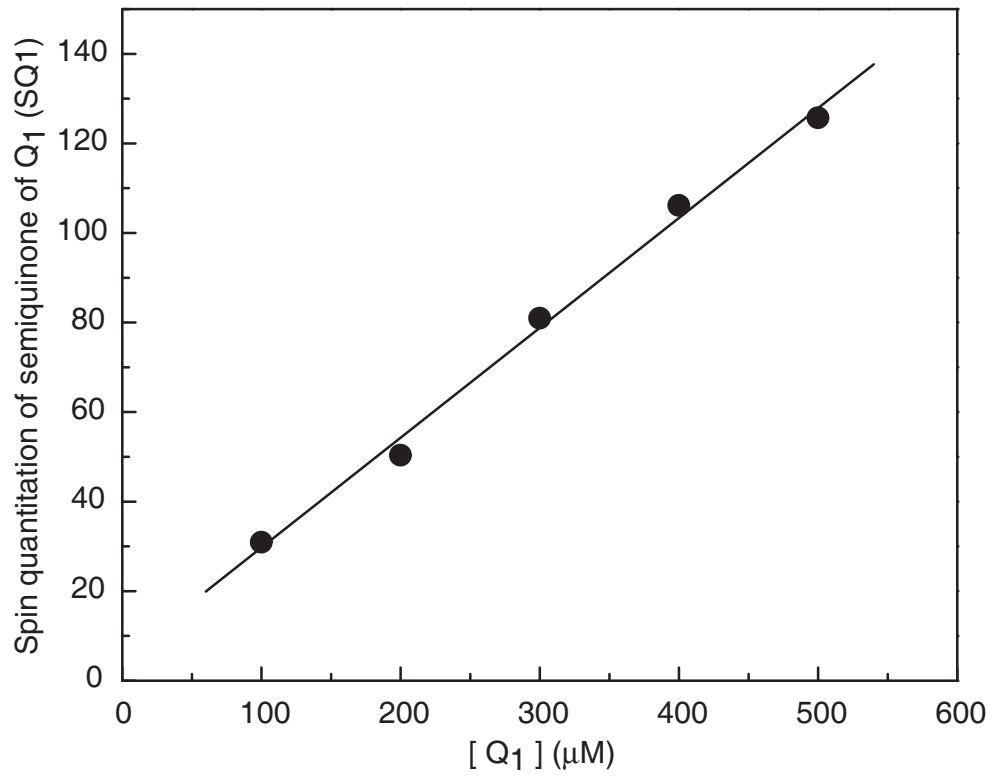

Supplemental Figure 2

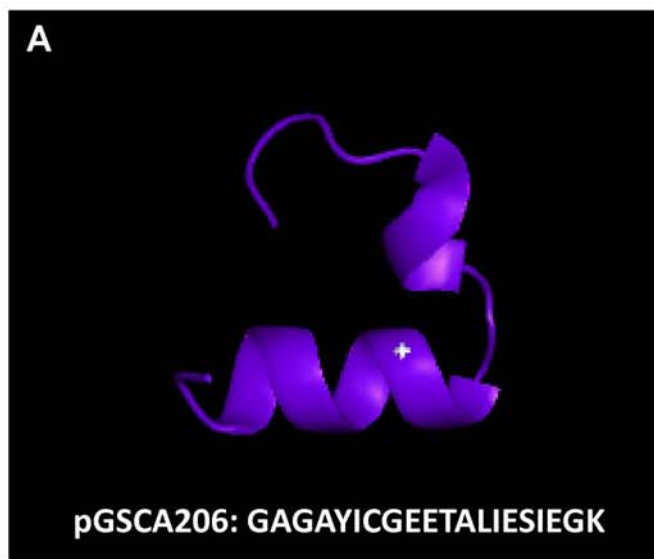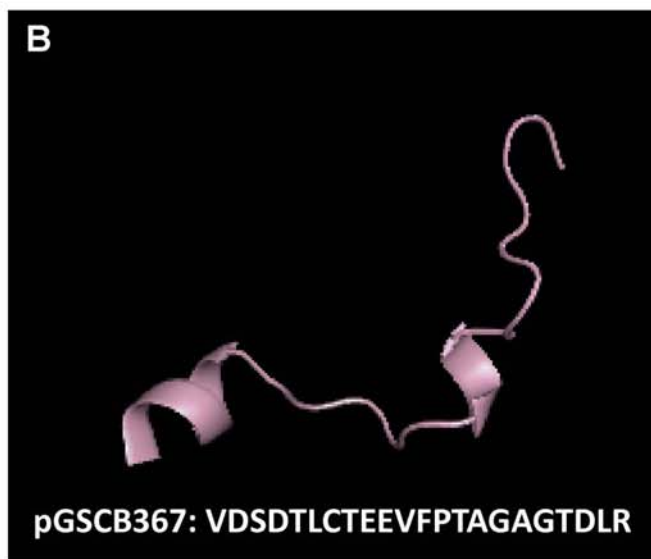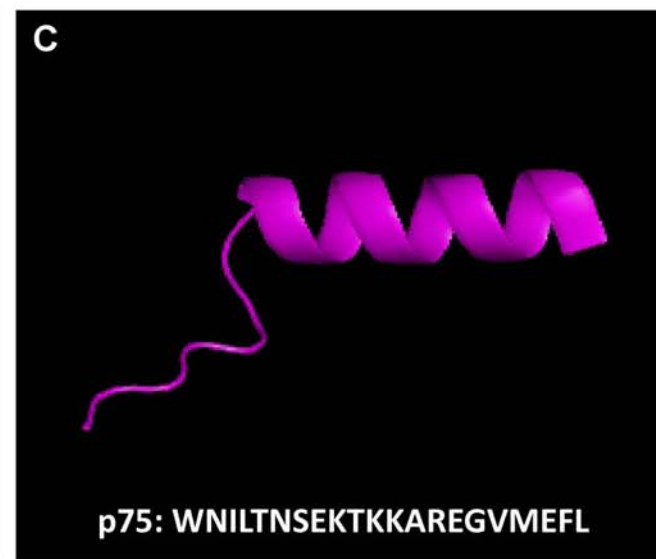

Supplemental Figure 3

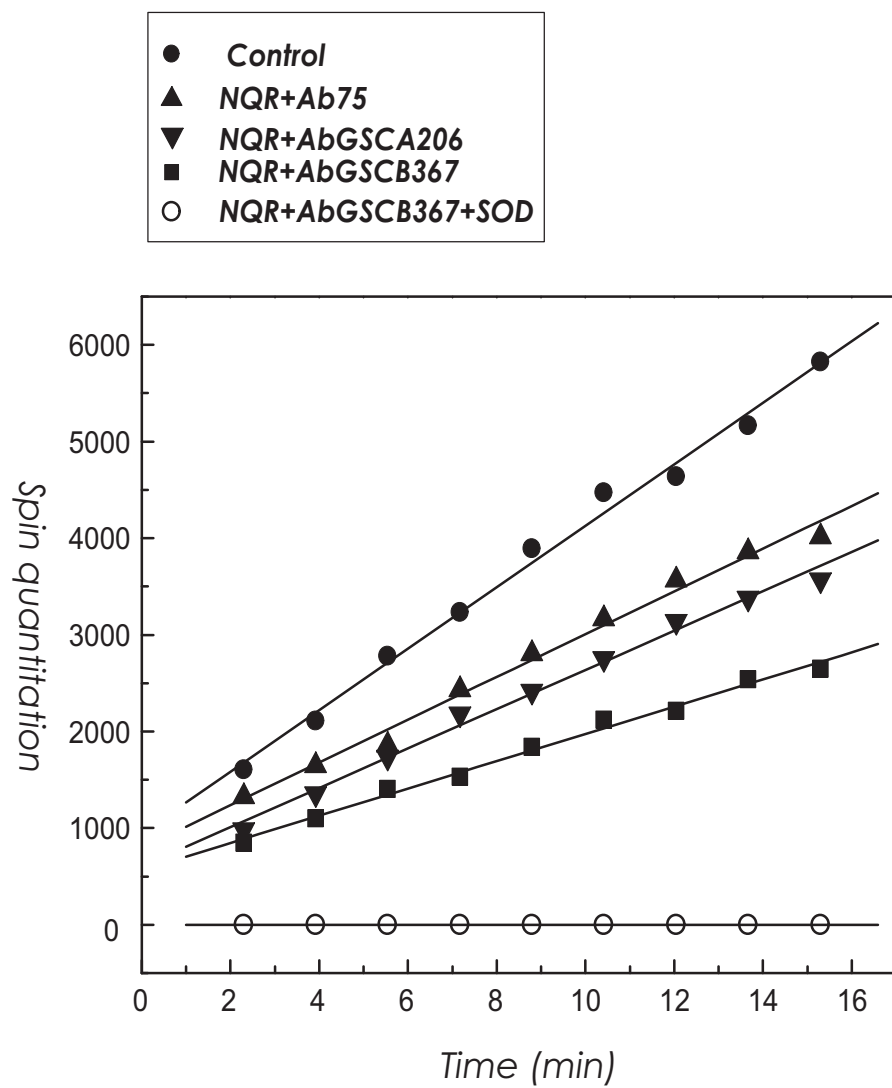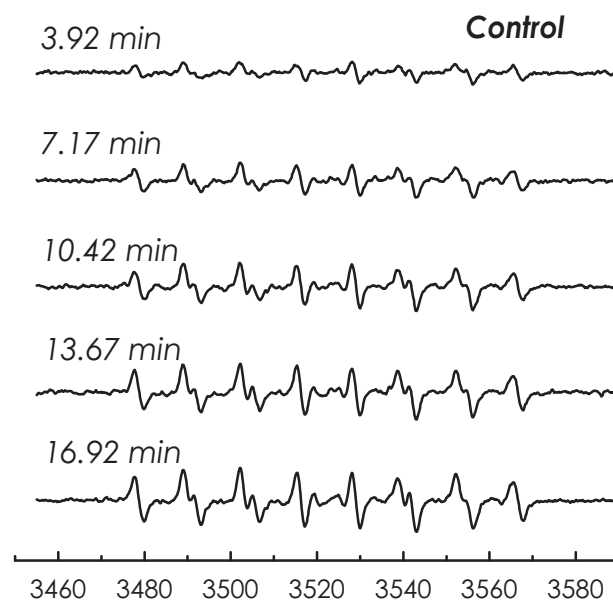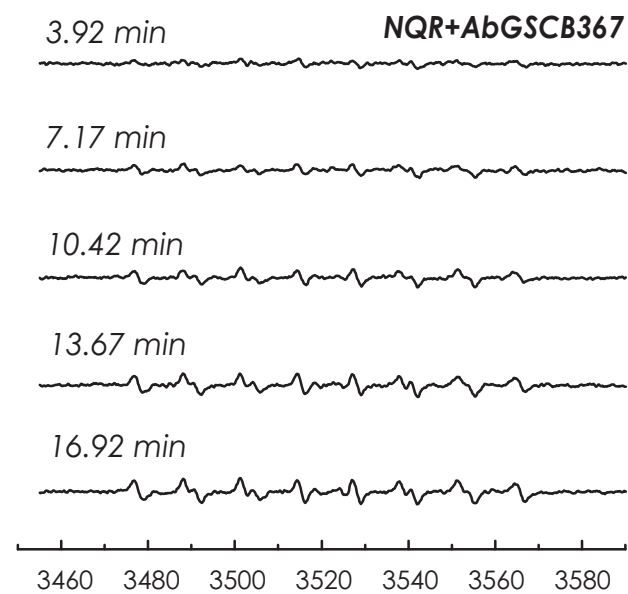

Supplemental Figure 4

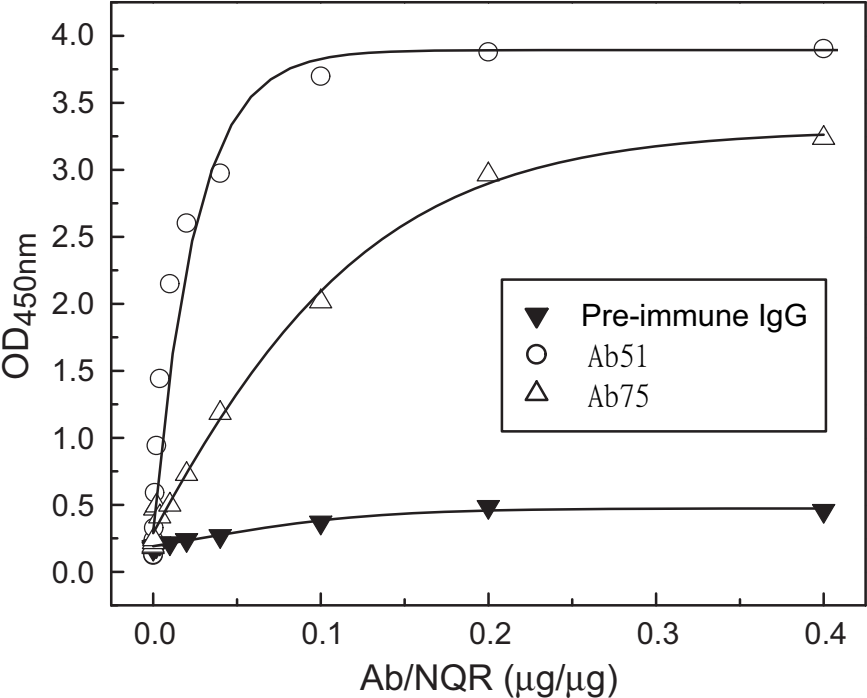

## Supplemental Figure 5

**1** MLAARHFLGG LVPVRVSVRF SSGTTAPKKT SFGSLKDEDR **IFTNLYGR**HD  
**51** WRLKGALRRG DWYKTKEILL KGPDWILGEM KTSGLRGRGG AGFPTGLKWS  
**101** FMNKPSDGRP **KYLVVNADEG EPGTCKDREI** MRHDPHKLVE GCLVGGRAMG  
**151** ARAAYIYIRG EFYNEASNLO VAIRE**EAYEAG LIGKN**ACGSD YDFDVVVR**G**  
**201** **AGAYICGEET ALIESIEGK**Q GKPRPKPPFP ADVGVFGCPT TVANVETVAV  
**251** SPTICRRGGT WFAGFGRERN SGTCLFNISG HVNHPCTVEE EMSVPLKELI  
**301** EKHAGGVTGG WDNLLAVIPG GSSTPLIPKS VCETVLMDFD ALVQAQTGLG  
**351** TAAVIVMDRS TDIVKAIARL IEFYKHESCG QCTPCREGVD WMNKVMARFV  
**401** KGDAR**PAEID SLWEISK**QIE GHTICALGDG AAWPVQGLIR **HFRPELEDR**M  
**451** QRFAQQHRAW QAAS

| Theoretical $m/z$       | Measured $m/z$         | Sequence                                           |
|-------------------------|------------------------|----------------------------------------------------|
| 492.2691 <sup>2+</sup>  | 492.52 <sup>2+</sup>   | <sup>41</sup> IFTNLYGR <sup>48</sup>               |
| 826.3852 <sup>2+</sup>  | 826.24 <sup>2+</sup>   | <sup>112</sup> YLVVNADEGEPGTCK <sup>126</sup>      |
| 641.79 <sup>3+</sup>    | 641.6353 <sup>3+</sup> | <sup>112</sup> YLVVNADEGEPGTCKDR <sup>128</sup>    |
| 525.7769 <sup>2+</sup>  | 525.70 <sup>2+</sup>   | <sup>175</sup> EAYEAGLIGK <sup>184</sup>           |
| 1034.4988 <sup>2+</sup> | 1034.76 <sup>2+</sup>  | <sup>200</sup> GAGAYICGEETALIESIEGK <sup>219</sup> |
| 694.3588 <sup>2+</sup>  | 694.65 <sup>2+</sup>   | <sup>406</sup> PAEIDSLWEISK <sup>417</sup>         |
| 400.2036 <sup>2+</sup>  | 400.50 <sup>2+</sup>   | <sup>441</sup> HFRPELEDR <sup>449</sup>            |

Amino acid sequence of the precursor of rat NQR 51-kDa subunit. The regions labeled in *red* represent the amino acid residues identified with nano-LC/MS/MS. The underlined region is the N-terminal extension (aa 1-20), which acts as an import sequence and does not exist in the mature protein.

## Supplemental Figure 6

001 MLRIPVKRAL IGLSKSPKGY VRSTGTAASN LIEVFVDGQS VMVEPGTTVL  
 051 QACEKVGMI PRFCYHERLS VAGNCRMCLV EIEKAPKVVA ACAMPVMK**GW**  
 101 **NILTNSEK**SK KAREGVMEFL LANHPLDCPI CDQGGECDLQ DQSMFMGSDR  
 151 SRFLEGKRAV EDKNIGPLVK TIMTRCIQCT RCIR**FASEIA** **GVDDLGTGR**  
 201 **GNDMQVGT**YI **EKM**FMSELSG NIIDICPVGA LTSKPYAFTA RPWETRKTES  
 251 IDVMDAVGSN IVVSTRTGEV MRILPRMHED INEEWISDKT RFAYDGLKRQ  
 301 RLTEPMVRNE KGLLYTSWE DALSR**VAGML** **QSFEGK**AVAA IAGGLVDAEA  
 351 LVALKDLLNK VSDTLCTEE IFPNEGAGTD LRSNYLLNTT IAGVEEADV  
 401 LLVGTNPR**FE** **APLFNAR**IRK SWLHNDLKVA LIGSPVDLTY **RYDHLGDS**PK  
 451 **ILQDIASGNH** **EF**SKVLNAAK **KPMVVLGSSA** **LQRDDGAAIL** **AAVSSIAQ**KI  
 501 RVASGAAAEW KVMNILHRIA **SQVAALDLGY** **KPGVEAIR**KN PPKLLFLLGA  
 551 **DGGCITR**QDL PKDCFIVYQG HHGDVGAPIA DVILPGAAYT EK**SATYV**NTE  
 601 **GRAQQT**K**VAV** **TPPGLAR**EDW KIIR**AL**SEIA **GITL**PYDTLD **QVR**NR**LGEV**S  
 651 **PNLVR**YDDVE **EADYFQQ**ASE **LAKLVDQ**EFL **ADPLVPP**QLT **IKDFY**MTDSI  
 701 **SR**ASQTMAKC VKAVTEGAQA VEEPSIC

| Theoretical $m/z$       | Measured $m/z$        | Peptide sequence                                                                     |
|-------------------------|-----------------------|--------------------------------------------------------------------------------------|
| 581.2986 <sup>2+</sup>  | 581.60 <sup>2+</sup>  | <sup>99</sup> GWNILTNSEK <sup>108</sup>                                              |
| 804.8968 <sup>2+</sup>  | 804.86 <sup>2+</sup>  | <sup>185</sup> FASEIAGVDDLGTGR <sup>200</sup>                                        |
| 677.8190 <sup>2+</sup>  | 678.12 <sup>2+</sup>  | <sup>201</sup> GNDMQVGT <b>YIEK</b> <sup>212</sup>                                   |
| 685.8165 <sup>2+</sup>  | 686.04 <sup>2+</sup>  | <sup>201</sup> GNDM <sub>(Ox)</sub> QVGT <b>YIEK</b> <sup>212</sup>                  |
| 591.7948 <sup>2+</sup>  | 591.84 <sup>2+</sup>  | <sup>326</sup> VAGM <sub>(Ox)</sub> LQSFEGK <sup>336</sup>                           |
| 532.7798 <sup>2+</sup>  | 532.79 <sup>2+</sup>  | <sup>409</sup> FEAPLFNAR <sup>417</sup>                                              |
| 516.2433 <sup>2+</sup>  | 516.53 <sup>2+</sup>  | <sup>442</sup> YDHLGDSPK <sup>450</sup>                                              |
| 779.8966 <sup>2+</sup>  | 780.23 <sup>2+</sup>  | <sup>451</sup> ILQDIASGNHEFSK <sup>464</sup>                                         |
| 701.3978 <sup>2+</sup>  | 701.76 <sup>2+</sup>  | <sup>471</sup> KPM <sub>(Ox)</sub> VVLGSSALQR <sup>483</sup>                         |
| 510.6105 <sup>3+</sup>  | 510.96 <sup>3+</sup>  | <sup>484</sup> DDGAAILAAVSSIAQK <sup>499</sup>                                       |
| 691.0564 <sup>3+</sup>  | 691.32 <sup>3+</sup>  | <sup>519</sup> IASQVAALDLGYKPGVEAIR <sup>538</sup>                                   |
| 753.4109 <sup>2+</sup>  | 753.67 <sup>2+</sup>  | <sup>544</sup> LLFLLGADGGC <sub>(CAM)</sub> ITR <sup>557</sup>                       |
| 549.2647 <sup>2+</sup>  | 549.47 <sup>2+</sup>  | <sup>593</sup> SATYVNT <b>EGR</b> <sup>602</sup>                                     |
| 490.7980 <sup>2+</sup>  | 491.04 <sup>2+</sup>  | <sup>608</sup> VAVTPPGLAR <sup>617</sup>                                             |
| 1038.0546 <sup>2+</sup> | 1037.91 <sup>2+</sup> | <sup>625</sup> ALSEIAGITL <b>PYDTLDQVR</b> <sup>643</sup>                            |
| 542.3115 <sup>2+</sup>  | 543.04 <sup>2+</sup>  | <sup>646</sup> LGEVSPNLVR <sup>655</sup>                                             |
| 1060.9684 <sup>2+</sup> | 1061.68 <sup>2+</sup> | <sup>656</sup> YDDVEEAD <sub>663</sub> YFQQASELAK <sup>673</sup>                     |
| 1068.6012 <sup>2+</sup> | 1068.48 <sup>2+</sup> | <sup>674</sup> LVDQEFLADPLVPPQLTIK <sup>692</sup>                                    |
| 1117.9109 <sup>3+</sup> | 1118.41 <sup>3+</sup> | <sup>674</sup> LVDQEFLADPLVPPQLTIKDFYMTDSISR <sup>702</sup>                          |
| 1123.2425 <sup>3+</sup> | 1123.59 <sup>3+</sup> | <sup>674</sup> LVDQEFLADPLVPPQLTIKDFY <b>M</b> <sub>(Ox)</sub> TDSISR <sup>702</sup> |

Amino acid sequence of the precursor of rat NQR 75-kDa subunit. The regions labeled in red represent the amino acid residues identified with nano-LC/MS/MS. The underlined region is the N-terminal extension (aa 1-23), which acts as an import sequence and does not exist in the mature protein.
